# Supplementary material for: Prevention of Cerebrospinal Fluid Leakage in the Anterior Transpetrosal Approach
Source: MDPI journal article supplement (doi:10.3390/jcm13061718), 2024-03-16
Supplement: s1 [file s1]

Table S1. Patients characteristics in ATPA

| No | Age | Sex | Location        | Pathology        | Air cell of<br>petrous apex<br>(PA) | Tract pattern<br>(PA)                | Air cell in squamous<br>part of temporal<br>bone (TB) | Tract pattern<br>(TB)             | Thin tympanic<br>tegmen | Dural closure<br>pattern | Spinal<br>drainage | CSF<br>leak |
|----|-----|-----|-----------------|------------------|-------------------------------------|--------------------------------------|-------------------------------------------------------|-----------------------------------|-------------------------|--------------------------|--------------------|-------------|
| 1  | 35  | M   | Petrous         | Chondrosarcoma   | -                                   | -                                    | +                                                     | Typical                           | +                       | Type 1                   | -                  | -           |
| 2  | 45  | M   | Petroclival     | Meningioma       | -                                   | -                                    | +                                                     | Typical                           | -                       | Type 2                   | -                  | -           |
| 3  | 46  | F   | Cavernous sinus | Meningioma       | +                                   | Direct                               | +                                                     | Typical                           | +                       | Type 3                   | +                  | -           |
| 4  | 70  | F   | Meckel's cave   | Metastatic tumor | +                                   | Unusual<br>(Peritubal)               | +                                                     | Typical                           | -                       | Type 3                   | +                  | -           |
| 5  | 56  | F   | Petroclival     | Meningioma       | +                                   | Unusual<br>(Peritubal)               | +                                                     | Unusual<br>(Squamous<br>tympanic) | -                       | Type 3                   | +                  | -           |
| 6  | 50  | F   | Petroclival     | Meningioma       | -                                   | -                                    | +                                                     | Typical                           | -                       | Type 2                   | +                  | -           |
| 7  | 68  | F   | Petroclival     | Meningioma       | -                                   | -                                    | +                                                     | Unusual<br>(Squamous<br>tympanic) | -                       | Type 2                   | -                  | -           |
| 8  | 53  | M   | Petroclival     | Meningioma       | +                                   | Unusual<br>(posterosuperior<br>cell) | +                                                     | Typical                           | -                       | Type 3                   | -                  | -           |
| 9  | 41  | F   | Petrous         | Meningioma       | -                                   | -                                    | +                                                     | Unusual<br>(Squamous<br>tympanic) | +                       | Type 2                   | -                  | -           |
| 10 | 55  | F   | Petroclival     | Meningioma       | +                                   | Unusual<br>(Hypotympanic)            | +                                                     | Unusual<br>(Squamous<br>tympanic) | +                       | Type 3                   | +                  | -           |
| 11 | 76  | F   | Petroclival     | Epidermoid       | -                                   | -                                    | +                                                     | Typical                           | -                       | Type 2                   | -                  | -           |

Table S2. Comparison of the incidence of CSF leakage and methods of CSF leakage prevention in ATPA among previous literatures

| Author          | Year | N   | CSF leak(%) | Methods                    |                            |      |     |             |         |           |                               |
|-----------------|------|-----|-------------|----------------------------|----------------------------|------|-----|-------------|---------|-----------|-------------------------------|
|                 |      |     |             | Preoperative imaging check | Preoperative 3D simulation | Flap | Fat | Fiblin glue | DuraGen | Endoscopy | Postoperative spinal drainage |
| Van Gompel [27] | 2015 | 46  | 4           | NA                         | NA                         | NA   | NA  | NA          | NA      | NA        | NA                            |
| Tamura [24]     | 2019 | 117 | 14.5        | +                          | -                          | +    | +   | +           | -       | -         | +                             |
| Volovici [28]   | 2020 | 25  | 28          | -                          | -                          | +    | +   | +           | -       | -         | +                             |
| Tomio [26]      | 2021 | 274 | 13.5        | +                          | -                          | +    | +   | +           | -       | -         | +                             |
| Adachi [1]      | 2023 | 48  | 0           | +                          | -                          | +    | +   | +           | -       | -         | -                             |
| Cheng [5]       | 2023 | 128 | 3.1         | -                          | -                          | +    | NA  | NA          | NA      | +         | +                             |
| Giammattei [10] | 2023 | 49  | 0           | +                          | -                          | +    | +   | +           | -       | -         | -                             |
| Present series  | 2023 | 11  | 0           | +                          | +                          | +    | +   | +           | +       | +         | +                             |

## References

- Adachi K, Hasegawa M, Hirose Y (2023) Cerebrospinal fluid leakage prevention using the anterior transpetrosal approach with versus without postoperative spinal drainage: an institutional cohort study. *Neurosurg Rev* 46:137
- Cheng Y, Song Y, Yang W, Wang L, Li X, Bai J, Xiao X (2023) The Evolution of Anterior Transpetrosal Approach for the Treatment of Petroclival Meningiomas: A Single-Center 128-Case Experience. *World Neurosurg*
- Giammattei L, Passeri T, Abbritti R, Lieber S, Matano F, Le Van T, Okano A, Fava A, di Russo P, Froelich S (2023) Surgical morbidity of the extradural anterior petrosal approach: the Lariboisiere experience. *J Neurosurg* 138:276-286
- Tamura R, Tomio R, Mohammad F, Toda M, Yoshida K (2018) Analysis of various tracts of mastoid air cells related to CSF leak after the anterior transpetrosal approach. *J Neurosurg* 130:360-367
- Tomio R, Horiguchi T, Borghei-Razavi H, Tamura R, Yoshida K, Kawase T (2021) Anterior transpetrosal approach: experiences in 274 cases over 33 years. Technical variations, operated patients, and approach-related complications. *J Neurosurg*:1-9
- Van Gompel JJ, Alikhani P, Youssef AS, Loveren HR, Boyev KP, Agazzi S (2015) Anterior Petrosectomy: Consecutive Series of 46 Patients with Attention to Approach-Related Complications. *J Neurol Surg B Skull Base* 76:379-384
- Volovici V, Dammers R, Dirven CMF, Delwel EJ (2020) Conquering the Rock-A Retrospective Single-Center Experience of the Transapical Petrosal Transtentorial (Kawase) Approach: Operative Technique and Impact on Cranial Nerve Function. *J Neurol Surg B Skull Base* 81:526-535
